# Supplementary material
Source: ML conference proceedings conference paper supplement (https://openaccess.thecvf.com/content/WACV2025/html/Wu_MegaFusion_Extend_Diffusion_WACV_2025_paper.html)
Supplement: Supplementary file 1 [file Wu_MegaFusion_Extend_Diffusion_WACV_2025_supplemental.pdf]

# MegaFusion: Extend Diffusion Models towards Higher-resolution Image Generation without Further Tuning - Supplementary Material

Haoning Wu\*, Shaocheng Shen\*, Qiang Hu†, Xiaoyun Zhang†, Ya Zhang, Yanfeng Wang  
Shanghai Jiao Tong University, China

In this appendix, we start by giving more details on the implementation details of our proposed MegaFusion in Section A. Then, we provide extra quantitative comparisons to further demonstrate the universality and effectiveness of our method in Section B. Next, we offer additional qualitative results across various experimental settings and methods to illustrate the superiority of our proposed MegaFusion in Section C. Finally, we discuss the limitations of our method and future work in Section D.

## A. Implementation Details

**More Details on Floyd-MegaFusion.** We have evaluated the higher-resolution image generation performance of Floyd [2] at resolutions of  $128 \times 128$  and  $512 \times 512$ . For  $128 \times 128$  resolution, we directly apply MegaFusion to the first stage of Floyd. As for the comparison at  $512 \times 512$  resolution, we utilize the first two stages of Floyd. Considering that the quality of the results from the first stage generation would significantly affect the second generation stage, we opt for using the  $64 \times 64$  images generated by the original first stage model as inputs of both the baseline and our boosted Floyd-MegaFusion. That is, higher-resolution image generation is only performed under the second generation stage. Ultimately, the experimental results presented in Tab.1 of our submitted manuscript effectively demonstrate the universality and effectiveness of our proposed MegaFusion. Furthermore, we also conduct experiments where  $128 \times 128$  out-of-distribution images are generated in the first stage, followed by  $512 \times 512$  resolution images in the second stage. This further demonstrates that MegaFusion maintains semantic accuracy across all stages of generation.

**Details on Human Evaluation.** To more effectively reflect the performance of different models in generating high-resolution images, we have recruited 10 volunteers with a background in image generation research for human evaluation. Specifically, the evaluators are asked to follow these rules: (i) Rate unknown source images on a score from 1 to 5 for both image quality and semantic accuracy, with higher scores indicating better quality; and (ii) Observe the results generated by different models with the same input condi-

tions and select their favourite one based on overall quality and semantic accuracy.

## B. Additional Quantitative Results

### B.1. Comparison on crop FID/KID

Following previous work [3], we also evaluate crop FID and crop KID metrics on the generated results of various models to reflect the quality of local patches in the images. As depicted in Table 1, previous methods are often limited to specific latent-space models, whereas our MegaFusion consistently improves the quality of high-resolution image generation across both latent-space and pixel-space models.

| Method       | SDM-1024             | SDXL-2048           | Floyd-128           | Floyd-512           |
|--------------|----------------------|---------------------|---------------------|---------------------|
| Original     | 41.21/0.0139         | 42.29/0.0125        | 70.16/0.0224        | 40.65/0.0171        |
| ScaleCrafter | <b>32.24/0.0085</b>  | 26.58/0.0062        | inapplicable        | inapplicable        |
| DemoFusion   | inapplicable         | 25.91/0.0061        | inapplicable        | inapplicable        |
| MegaFusion   | 39.42/0.0137         | 27.38/0.0063        | 57.24/0.0243        | 32.36/0.0122        |
| MegaFusion++ | 33.39/ <b>0.0084</b> | <b>25.64/0.0049</b> | <b>41.22/0.0188</b> | <b>29.18/0.0077</b> |

Table 1. Comparison of  $FID_{crop}/KID_{crop}$  on MS-COCO dataset.

### B.2. Comparison on CUB-200 Dataset

To demonstrate the universality of our proposed MegaFusion, in addition to the MS-COCO [7] dataset, we also conduct quantitative evaluations on the CUB-200 [10] dataset, which is also commonly used in previous works. The CUB-200 dataset consists of over 10K images of 200 categories of birds, each accompanied by 10 textual descriptions. Considering computational costs and time expenditure, similar to the experimental settings on the MS-COCO dataset in our manuscript, we randomly select 1K images from the CUB-200 dataset. Each image is assigned a fixed caption, and the same random seed is used across different methods to eliminate the effects of randomness among models. As depicted in Table 2, our proposed MegaFusion can also be universally applied to both latent-space and pixel-space diffusion models on the CUB-200 dataset, achieving high-quality higher-resolution image generation.

| Methods            | resolution  | FID <sub>r</sub> ↓ | FID <sub>b</sub> ↓ | KID <sub>r</sub> ↓ | KID <sub>b</sub> ↓ | CLIP-T↑       | CIDEr↑       | Meteor↑      | ROUGE↑       | GFlops        | Inference time |
|--------------------|-------------|--------------------|--------------------|--------------------|--------------------|---------------|--------------|--------------|--------------|---------------|----------------|
| SDM [9]            | 1024 × 1024 | 77.92              | 46.34              | 0.0363             | 0.0220             | 0.2952        | 8.12         | 7.48         | 7.09         | 135.0K        | 15.17s         |
| SDM-MegaFusion     | 1024 × 1024 | <u>71.78</u>       | <u>36.21</u>       | <u>0.0303</u>      | <u>0.0189</u>      | <u>0.3060</u> | <u>24.46</u> | <u>11.98</u> | <u>12.62</u> | <b>48.2K</b>  | <b>7.56s</b>   |
| SDM-MegaFusion++   | 1024 × 1024 | <b>68.92</b>       | <b>34.94</b>       | <b>0.0251</b>      | <b>0.0182</b>      | <b>0.3115</b> | <b>28.52</b> | <b>12.32</b> | <b>13.29</b> | <b>48.2K</b>  | <b>7.56s</b>   |
| SDXL [8]           | 2048 × 2048 | 73.49              | 48.78              | 0.0308             | 0.0274             | 0.2994        | 16.43        | 9.90         | 10.35        | 540.2K        | 79.66s         |
| SDXL-MegaFusion    | 2048 × 2048 | <u>72.62</u>       | <u>13.72</u>       | <u>0.0296</u>      | <u>0.0039</u>      | <u>0.3113</u> | <u>25.98</u> | <u>13.23</u> | <u>13.33</u> | <b>216.1K</b> | <b>30.94s</b>  |
| SDXL-MegaFusion++  | 2048 × 2048 | <b>65.10</b>       | <b>11.55</b>       | <b>0.0225</b>      | <b>0.0026</b>      | <b>0.3122</b> | <b>26.35</b> | <b>13.98</b> | <b>14.92</b> | <b>216.1K</b> | <b>30.94s</b>  |
| Floyd-Stage1 [2]   | 128 × 128   | 87.04              | 105.59             | <u>0.0341</u>      | 0.0658             | 0.2866        | 9.95         | 8.28         | 9.07         | 111.7K        | 77.08s         |
| Floyd-MegaFusion   | 128 × 128   | <u>77.82</u>       | <b>36.49</b>       | 0.0413             | <b>0.0281</b>      | <u>0.3080</u> | <u>22.12</u> | <b>17.06</b> | <b>20.62</b> | <b>44.9K</b>  | <b>32.19s</b>  |
| Floyd-MegaFusion++ | 128 × 128   | <b>73.54</b>       | <u>45.76</u>       | <b>0.0334</b>      | <u>0.0388</u>      | <b>0.3086</b> | <b>22.52</b> | <u>16.93</u> | <u>20.05</u> | <b>44.9K</b>  | <b>32.19s</b>  |
| Floyd-Stage2 [2]   | 512 × 512   | 80.34              | 41.65              | 0.0401             | 0.0215             | 0.3013        | 23.59        | 12.28        | 11.67        | 60.7K         | 48.58s         |
| Floyd-MegaFusion   | 512 × 512   | <u>77.66</u>       | <u>39.34</u>       | <u>0.0348</u>      | <u>0.0141</u>      | <u>0.3110</u> | <u>24.63</u> | <b>15.74</b> | <u>15.29</u> | <b>24.3K</b>  | <b>21.72s</b>  |
| Floyd-MegaFusion++ | 512 × 512   | <b>62.91</b>       | <b>34.40</b>       | <b>0.0232</b>      | <b>0.0115</b>      | <b>0.3141</b> | <b>25.44</b> | <u>13.90</u> | <b>18.51</b> | <b>24.3K</b>  | <b>21.72s</b>  |

Table 2. **Quantitative comparison** on CUB-200 [10] dataset. **RED**: best performance, **BLUE**: second best performance.

| Methods            | resolution | FID <sub>r</sub> ↓ | FID <sub>b</sub> ↓ | KID <sub>r</sub> ↓ | KID <sub>b</sub> ↓ | CLIP-T↑       | CIDEr↑       | Meteor↑      | ROUGE↑       | GFlops       | Inference time |
|--------------------|------------|--------------------|--------------------|--------------------|--------------------|---------------|--------------|--------------|--------------|--------------|----------------|
| Floyd-Stage1 [2]   | 128 × 128  | 66.27              | 81.65              | <u>0.0262</u>      | 0.0454             | 0.2818        | 14.69        | 18.22        | 25.06        | 111.7K       | 77.08s         |
| Floyd-MegaFusion   | 128 × 128  | <u>53.09</u>       | <b>39.73</b>       | 0.0273             | <b>0.0334</b>      | <u>0.3024</u> | <b>25.01</b> | <u>25.00</u> | <u>31.35</u> | <b>44.9K</b> | <b>32.19s</b>  |
| Floyd-MegaFusion++ | 128 × 128  | <b>43.43</b>       | <u>50.08</u>       | <b>0.0213</b>      | <u>0.0437</u>      | <b>0.3046</b> | <u>20.28</u> | <b>25.01</b> | <b>31.64</b> | <b>44.9K</b> | <b>32.19s</b>  |
| Floyd-Stage2 [2]   | 64 → 512   | 46.64              | 38.15              | 0.0254             | 0.0166             | 0.3098        | <u>23.85</u> | 21.47        | 26.26        | 60.7K        | 48.58s         |
| Floyd-MegaFusion   | 64 → 512   | <u>39.80</u>       | <u>24.87</u>       | <u>0.0164</u>      | <u>0.0078</u>      | <u>0.3106</u> | 23.22        | <u>23.51</u> | <u>29.30</u> | <b>24.3K</b> | <b>21.72s</b>  |
| Floyd-MegaFusion++ | 64 → 512   | <b>26.34</b>       | <b>24.55</b>       | <b>0.0063</b>      | <b>0.0077</b>      | <b>0.3110</b> | <b>24.01</b> | <b>23.58</b> | <b>29.52</b> | <b>24.3K</b> | <b>21.72s</b>  |
| Floyd-Stage2 [2]   | 128 → 512  | 61.24              | 108.01             | 0.0253             | 0.0734             | 0.2779        | 15.16        | 14.76        | 19.75        | 60.7K        | 48.58s         |
| Floyd-MegaFusion   | 128 → 512  | <u>58.19</u>       | <b>88.56</b>       | <u>0.0187</u>      | <b>0.0379</b>      | <u>0.2821</u> | <u>16.28</u> | <b>15.65</b> | <u>20.02</u> | <b>24.3K</b> | <b>21.72s</b>  |
| Floyd-MegaFusion++ | 128 → 512  | <b>57.92</b>       | <u>94.93</u>       | <b>0.0181</b>      | <u>0.0417</u>      | <b>0.2835</b> | <b>16.36</b> | <u>15.47</u> | <b>21.34</b> | <b>24.3K</b> | <b>21.72s</b>  |

Table 3. **More comparison results** on Floyd model and its MegaFusion boosted counterparts under different settings. Within each unit, we denote the best performance in **RED** and the second-best performance in **BLUE**.

### B.3. More Results of Floyd-MegaFusion

As mentioned above, we also conduct experiments that first generate  $128 \times 128$  out-of-distribution images, followed by  $512 \times 512$  high-resolution images on the Floyd model. As depicted in Table 3, MegaFusion consistently improves the high-resolution generation capability of Floyd under both settings. This demonstrates that MegaFusion can improve the semantic accuracy of high-resolution images at any stage of the generation process.

### B.4. Ablation Study of Classifier-free Guidance

As detailed in the implementation details, to ensure a fair comparison and eliminate the impact of classifier-free guidance (CFG) on generation quality and efficiency, we use the default CFG weights from official implementations for all methods and their corresponding MegaFusion-boosted counterparts. To further investigate the impact of CFG on MegaFusion at higher resolutions, we generate 100 images from the MS-COCO dataset using SDM-MegaFusion and SDXL-MegaFusion with varying CFG values, using the same text prompt and random seed as inputs, and evaluate

the FID scores against our testset. The results in Figure 1 indicate that classifier-free guidance does affect our high-resolution generation quality, with preliminary findings indicating that  $w = 7.0$  is a relatively good choice for SDM-MegaFusion and SDXL-MegaFusion.

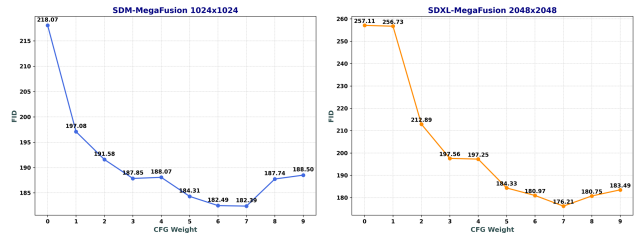

Figure 1. **Ablation study** of classifier-free guidance (CFG) weight on SDM-MegaFusion and SDXL-MegaFusion.

## C. Additional Qualitative Results

### C.1. Evidence Behind the Core idea & intuition

As stated in eDiff-I [1], diffusion models synthesize semantics during early denoising stages and refine image details in later stages. As depicted in Figure 2, we also observe that semantic deviations and object repetitions commonly encountered at higher resolutions primarily stem from incorrect semantics generated during early denoising, leading to irreparable errors. Thus, our **intuition and insight** here are: perform early denoising at the original resolution to generate accurate semantic information, followed by *truncate* and *relay* to continue denoising at higher resolutions, thereby enriching texture details. This enables MegaFusion to produce high-quality, semantically accurate higher-resolution images with lower computational costs, while supporting arbitrary aspect ratios.

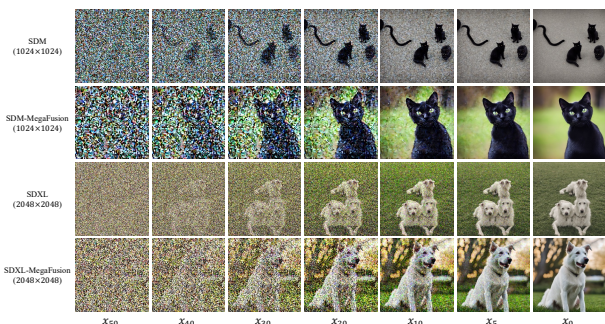

Figure 2. **Evidence behind our core idea and intuition.** For  $T = 50$  steps of DDIM sampling, we visualize the key stages of the image generation process. For SDM and SDXL, incorrect semantics are generated during the early denoising stages of high-resolution generation, leading to irreparable errors. In contrast, MegaFusion generates accurate semantics and further enriches texture details at higher resolutions. The input text prompts are “A cute black cat” and “A white dog sits on the grass.” For ease of visualization, the images are scaled to the same size.

### C.2. Disadvantages of Direct Upsampling

Compared to our MegaFusion for higher-resolution image generation, a more straightforward approach is to directly apply upsampling to images generated by diffusion models. Although simple, this will introduce three potential issues: (i) Direct super-resolution may lead to unrealistic texture details, such as blurring and artifacts, especially at high upsampling factors; (ii) While diffusion-based SR methods can produce more realistic textures via iterative denoising, they often involve significantly higher computational costs and may not support arbitrary aspect ratios; (iii) Most critically, as shown in Figure 3, directly upsampling low-resolution images can stretch and distort content, particularly when generating under non-standard aspect ratios (e.g. 1 : 4), diminishing the natural aesthetic of images.

In contrast, MegaFusion seamlessly bridges coarse-to-fine generation processes, efficiently producing accurate semantics at low resolutions and enriching texture details at high resolutions. Leveraging iterative denoising at higher resolutions, it can synthesize aesthetically pleasing high-resolution images even with non-standard aspect ratios.

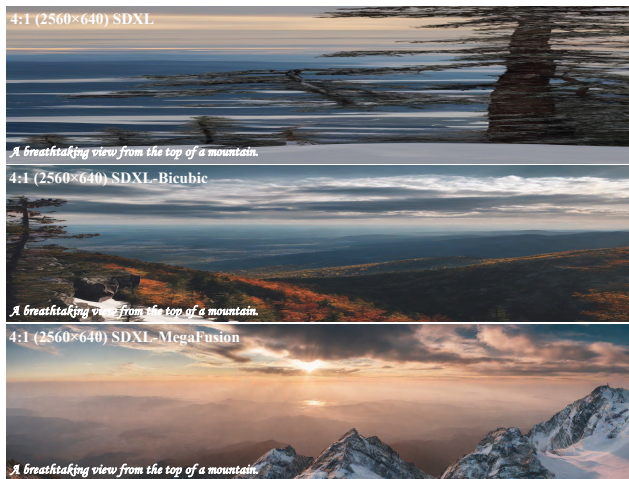

Figure 3. **Analysis of direct upsampling.** Using diffusion models to generate images with non-standard aspect ratios directly or via upsampling, may lead to stretching and distortion (e.g., trees on both sides), while MegaFusion effectively mitigates this issue.

### C.3. Effects of hyperparameters $\delta$ and $\gamma$

For denoising at the original size, we do not employ dilation. In qualitative experiments for high-resolution generation, we test various  $\delta$  values and find that  $\delta = 2$  is a stable choice under our experimental settings, which will not introduce blurriness or semantic deviations. As described in our manuscript, we draw inspiration from simple diffusion [6], which derives the SNR relationship between images of different resolution based on the mean and variance of pixel distributions. Substituting this into our derived relationship, we obtain that  $\gamma = 4$ . Qualitative experiments also confirm that this is an appropriate choice. Some visualization examples are shown in Figure 4.

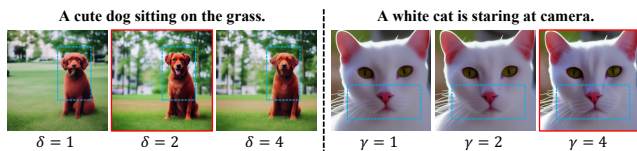

Figure 4. **Qualitative comparisons** of applying different hyperparameters  $\delta$  and  $\gamma$ .

### C.4. Ablation Study of Truncation Steps

In the *truncate and relay* strategy, the number of denoising steps at each stage may also affect generation qual-

ity. Our intuition and experience suggest that more denoising steps at lower resolutions improve generation efficiency, while additional steps at higher resolutions enhance texture details. However, conducting a comprehensive evaluation to determine the optimal truncation steps would incur significant computational costs. Therefore, in our implementation, we empirically select truncation steps for each model based on experience, and validate the above conclusions through qualitative experiments, as shown in Figure 5. Considering the trade-off between generation quality and efficiency, we choose denoising steps of  $T_1 = 40$ ,  $T_2 = 5$ , and  $T_3 = 5$  as the default configuration for SDM-MegaFusion.

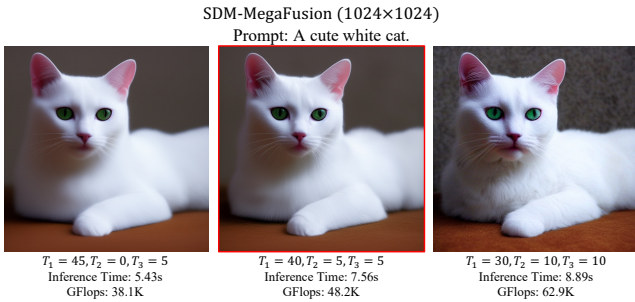

Figure 5. **Qualitative ablation study** of truncation steps.

### C.5. Text-to-Image Foundation Models

We present more visualizations of higher-resolution image generation using both latent-space and pixel-space text-to-image models in Figure 6 and 7, respectively, to demonstrate the universality and robustness of our proposed method. The visual outcomes explicitly confirm that when pre-trained models fail to scale to higher resolutions, our approach can be universally integrated into existing latent-space and pixel-space diffusion models, improving their capability to synthesize higher-resolution images of megapixels with accurate semantics. Moreover, our further enhanced MegaFusion++ significantly boosts the quality of the generated images, producing sharper and clearer details.

### C.6. Compatibility with Transformer-based Models

To further demonstrate the versatility and effectiveness of MegaFusion, we also apply it to the transformer-based (DiT) SD3 [4] model. Since DiT-based methods do not involve convolutions, we boost the model via only the *truncate and relay* strategy. As presented in Figure 8, SD3 also encounters quality degradation when generating higher-resolution images directly, while our MegaFusion effectively improves its high-resolution generation capabilities.

### C.7. Comparison to state-of-the-art

To further evaluate the quality of MegaFusion, we compare it with existing state-of-the-art high-resolution genera-

tion methods. Given that these methods (ScaleCrafter [5] and DemoFusion [3]) are typically restricted to specific models, we conduct comparisons on models based on SDXL. The results in Figure 9 indicate that existing methods still face quality degradation and object repetition when generating high-resolution images. In contrast, MegaFusion produces high-quality, semantically accurate high-resolution images, and is much more efficient than existing approaches, as shown in Tab.1 of our manuscript.

### C.8. Models with additional conditions

We have confirmed that our method is equally applicable to diffusion models with additional input conditions, such as ControlNet [12] with depth maps and IP-Adapter [11] with reference images as extra inputs. As depicted in Figure 10, we further discover that ControlNet with canny edges or human poses as conditional inputs also struggle with synthesizing higher-resolution images, and often produce images that are not fidelity to input conditions, with confusing semantics and poor image quality. In contrast, with the assistance of our proposed MegaFusion, our boosted model, ControlNet-MegaFusion consistently generates high-quality images of higher resolutions with accurate semantics, that are fidelity to conditions.

### C.9. Generation with Arbitrary Aspect Ratios

As previously stated, our MegaFusion also enables existing pre-trained diffusion models to generate images at arbitrary aspect ratios. Figure 11, 12 and 13 showcase more qualitative results from SDXL-MegaFusion across various aspect ratios and resolutions, including 1 : 1 (2048 × 2048), 16 : 9 (1920 × 1080), 3 : 4 (1536 × 2048), and 4 : 3 (2048 × 1536). Moreover, as presented in Figure 14, 15, and 16, we also include visualizations with **non-standard** aspect ratios, such as 1 : 4 (640 × 2560), 4 : 1 (2560 × 640), 1 : 2 (1024 × 2048), 2 : 1 (2048 × 1024), 21 : 9 (2016 × 864), and 9 : 21 (864 × 2016). These impressive outcomes further demonstrate the scalability and superiority of our approach.

### C.10. Compatibility with LoRA

To further illustrate the versatility and broad applicability of MegaFusion, we apply it to SDM and SDXL models using LoRA from the open-source community for personalized higher-resolution image generation. As depicted in Figure 17, MegaFusion can seamlessly integrate with various LoRAs of SDM and SDXL, demonstrating significant potential for artistic and commercial applications.

## D. Limitations & Future Work

### D.1. Limitations

Since our proposed MegaFusion is a tuning-free approach built on existing latent-space and pixel-space image

generation models, it inevitably inherits some limitations of current diffusion-based generative models. For example, when handling complex textual conditions, the generated content often struggles to accurately reflect input prompts, particularly in aspects such as attribute binding and positional control. This may lead to degraded synthesis quality during high-resolution generation with MegaFusion. However, more powerful backbone models are expected to mitigate this issue, and when combined with MegaFusion, they are likely to produce higher-quality images at higher resolutions with low computational costs.

## **D.2. Future Work**

The striking quantitative results produced by MegaFusion have confirmed its potential to overcome the limitations of existing diffusion-based generative models and to improve their capabilities to synthesize high-resolution outcomes. Additionally, we have observed that existing video generation models encounter significant semantic deviations and quality degradation when generating content beyond their pre-trained spatial resolution and temporal length. Therefore, we anticipate further applying MegaFusion to current video generation models towards efficient, low-cost, higher-resolution, and longer video content generation. Similarly, MegaFusion also holds the potential for extension to 3D generation models and models for image and video editing, which are also left for future exploration.

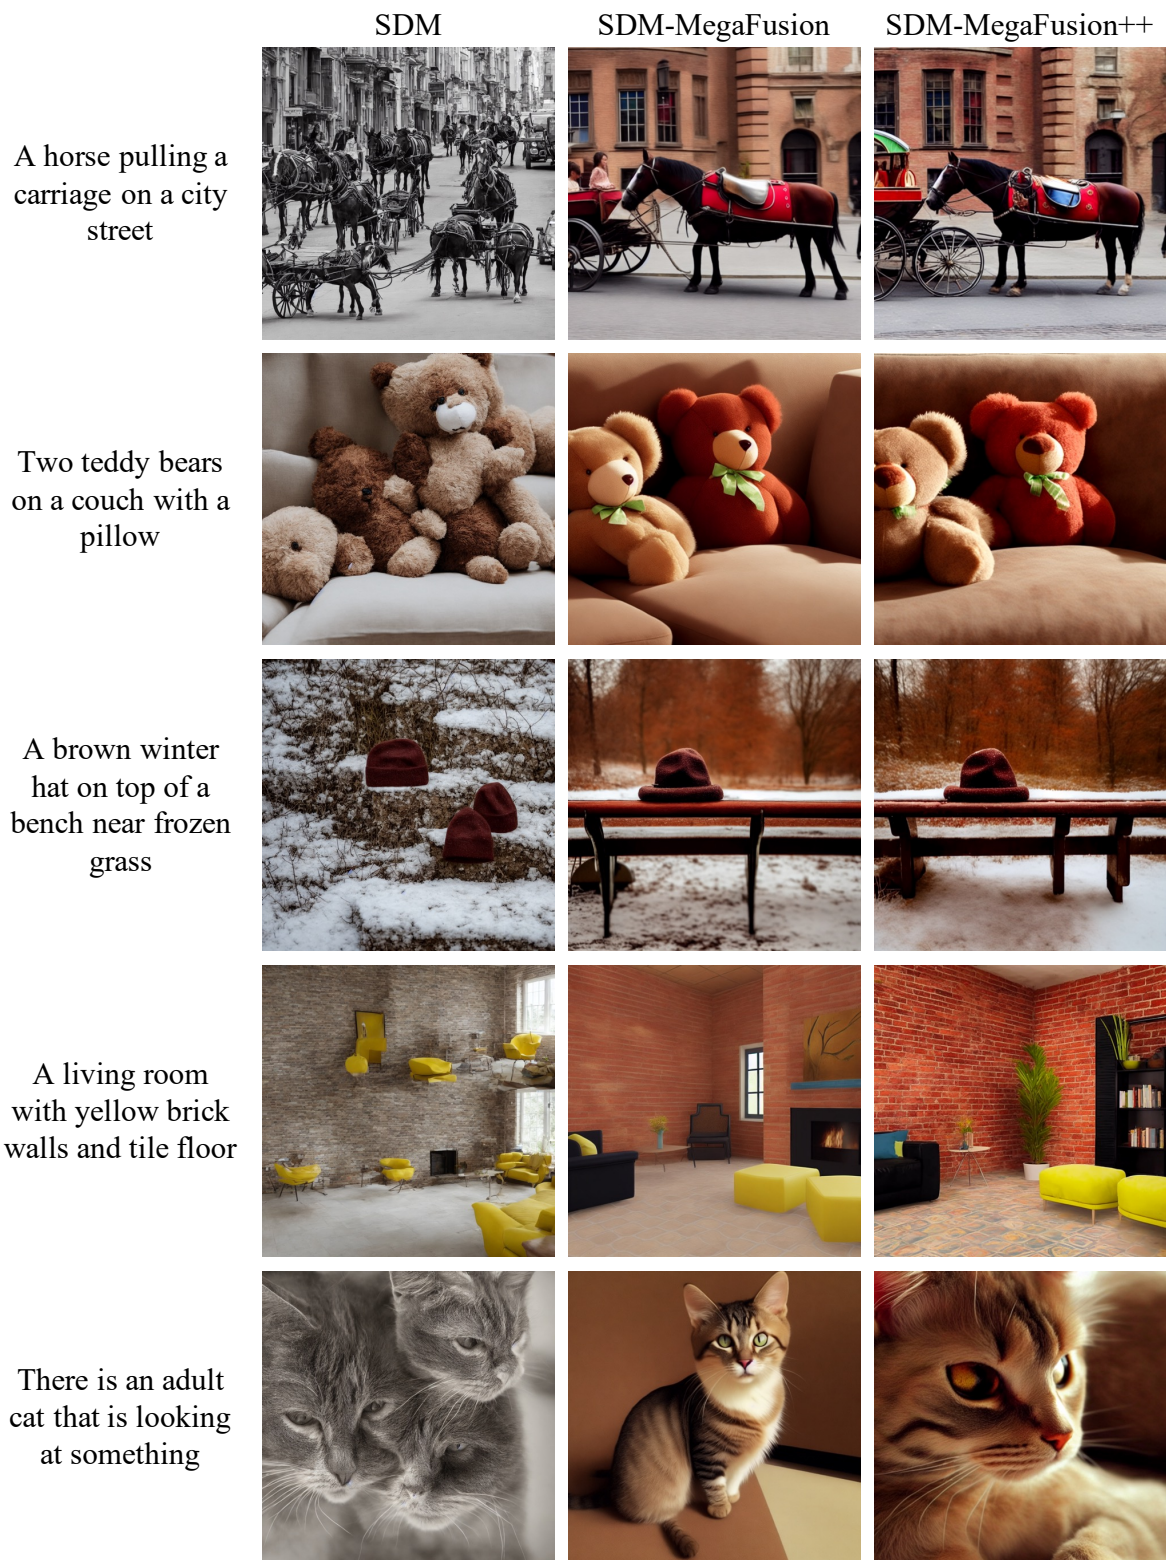

Figure 6. **More qualitative results** of applying our MegaFusion to latent-space diffusion model (SDM [9]) for higher-resolution ( $1024 \times 1024$ ) image generation on MS-COCO [7] and commonly used prompts from the Internet.

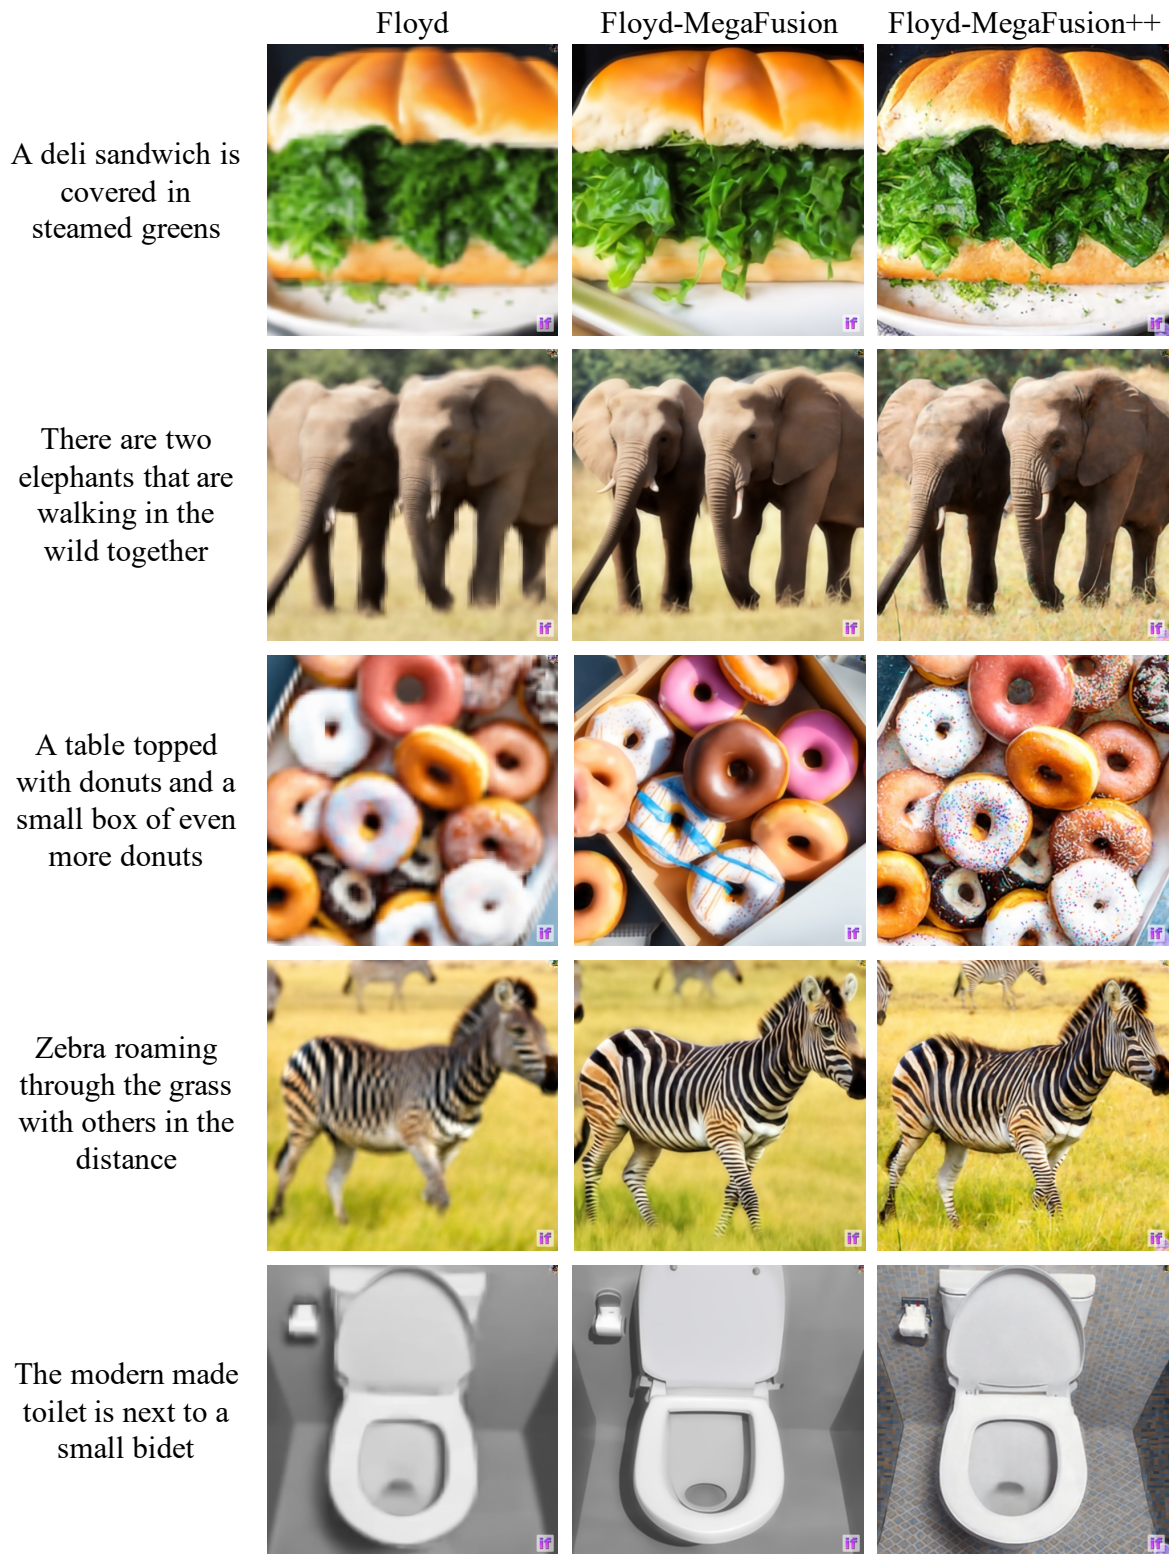

Figure 7. **More qualitative results** of applying our MegaFusion to pixel-space diffusion model (Floyd [2]) for higher-resolution ( $512 \times 512$ ) image generation on MS-COCO [7] and commonly used prompts from the Internet.

SD3

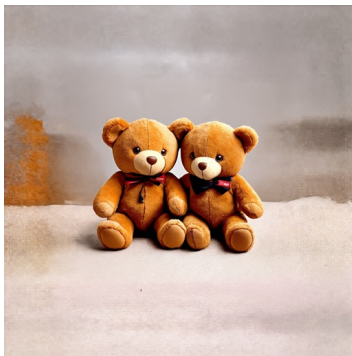

SD3-MegaFusion

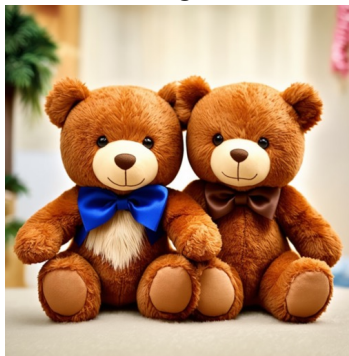

*The two teddy bears are posed together to take a photo.*

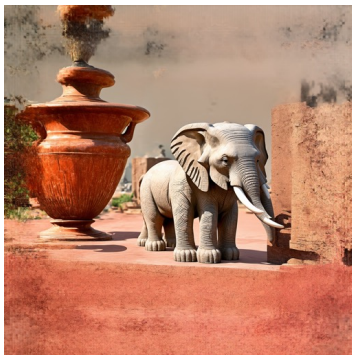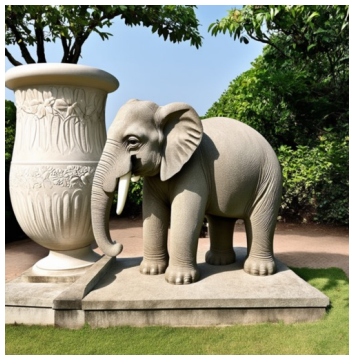

*A stone statue of an elephant near a large vase.*

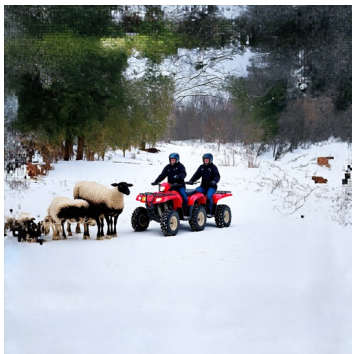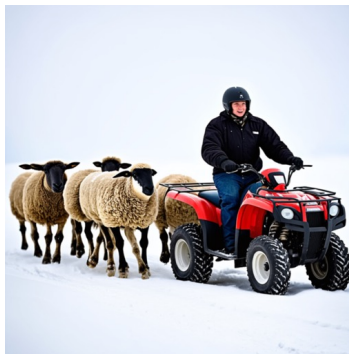

*A person on a four-wheeler herding sheep in the snow.*

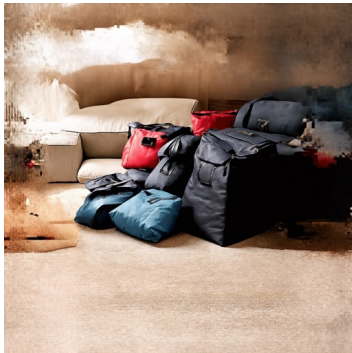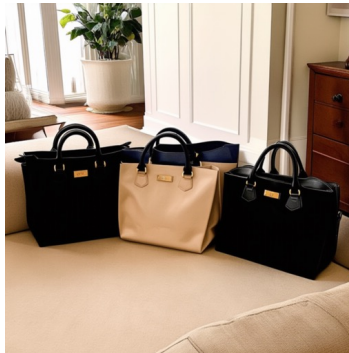

*A few bags laying around in a living room.*

Figure 8. **Qualitative results** of applying our MegaFusion to latent-space diffusion model (SD3 [4]) for higher-resolution ( $2048 \times 2048$ ) image generation on MS-COCO [7] and commonly used prompts from the Internet.



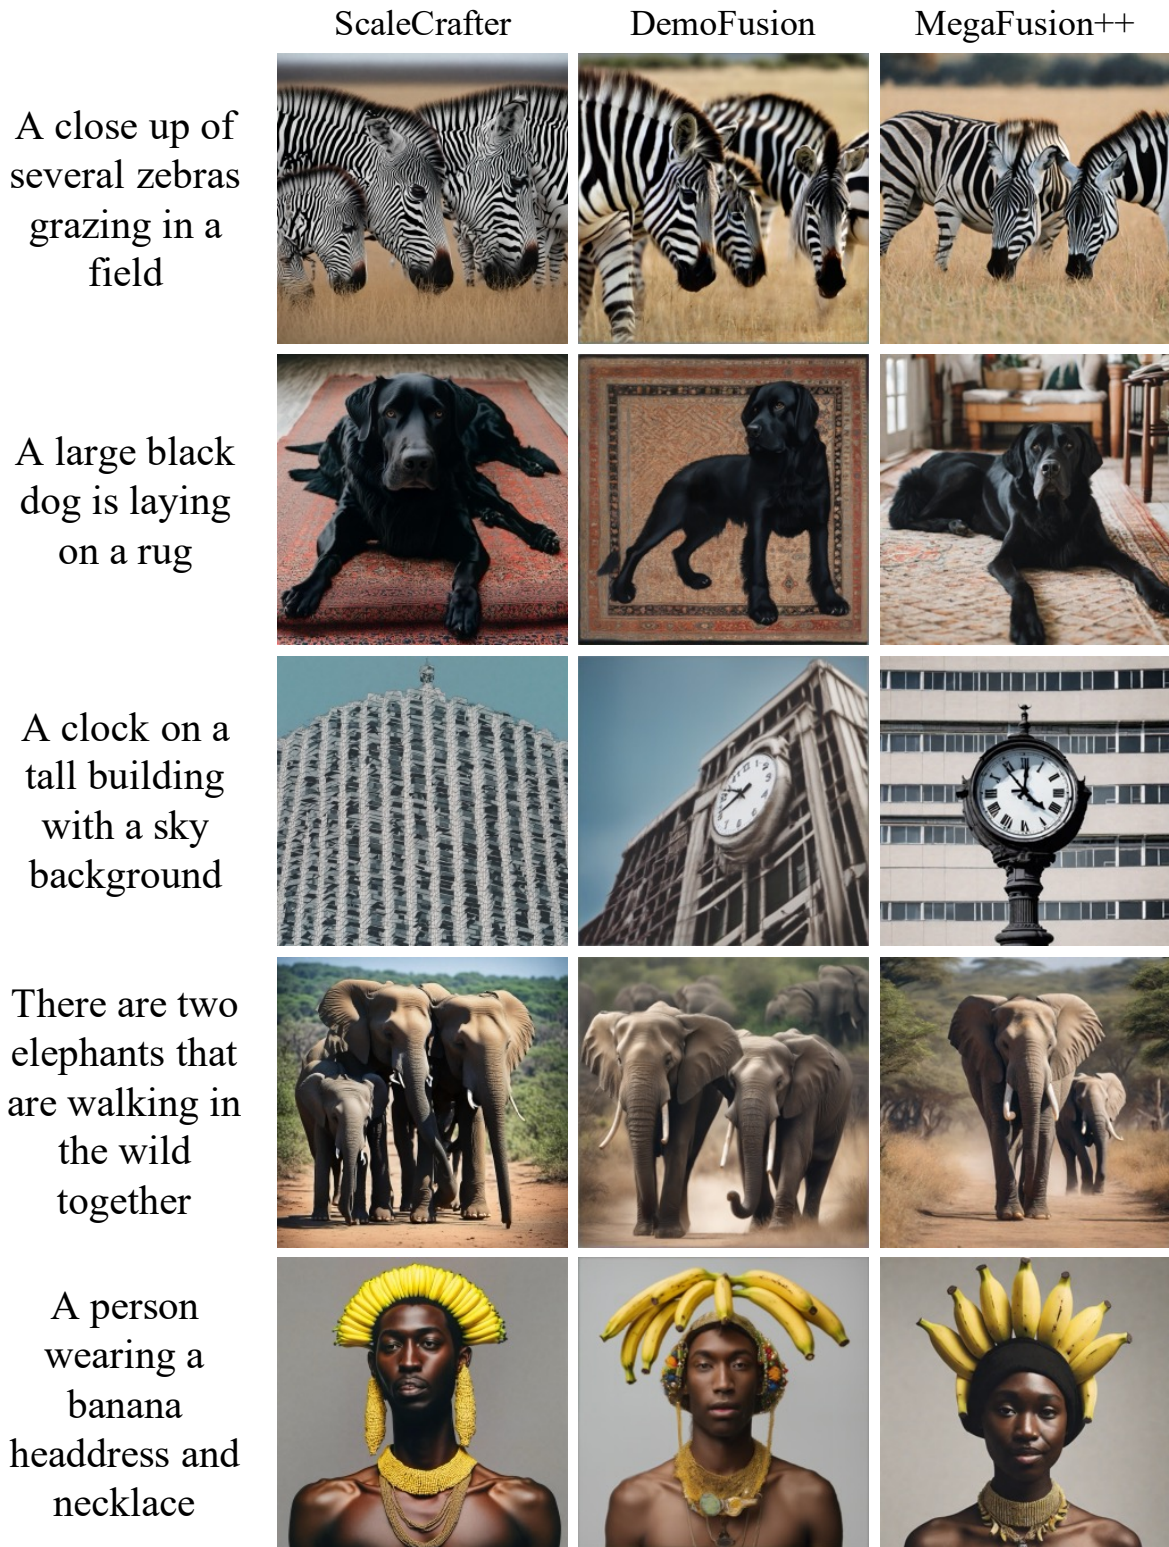

Figure 9. **Qualitative comparison** with existing state-of-the-art methods (ScaleCrafter [5] and DemoFusion [3]). Our MegaFusion can generate images with details and accurate semantics at high resolution, whereas existing methods struggle to do so.

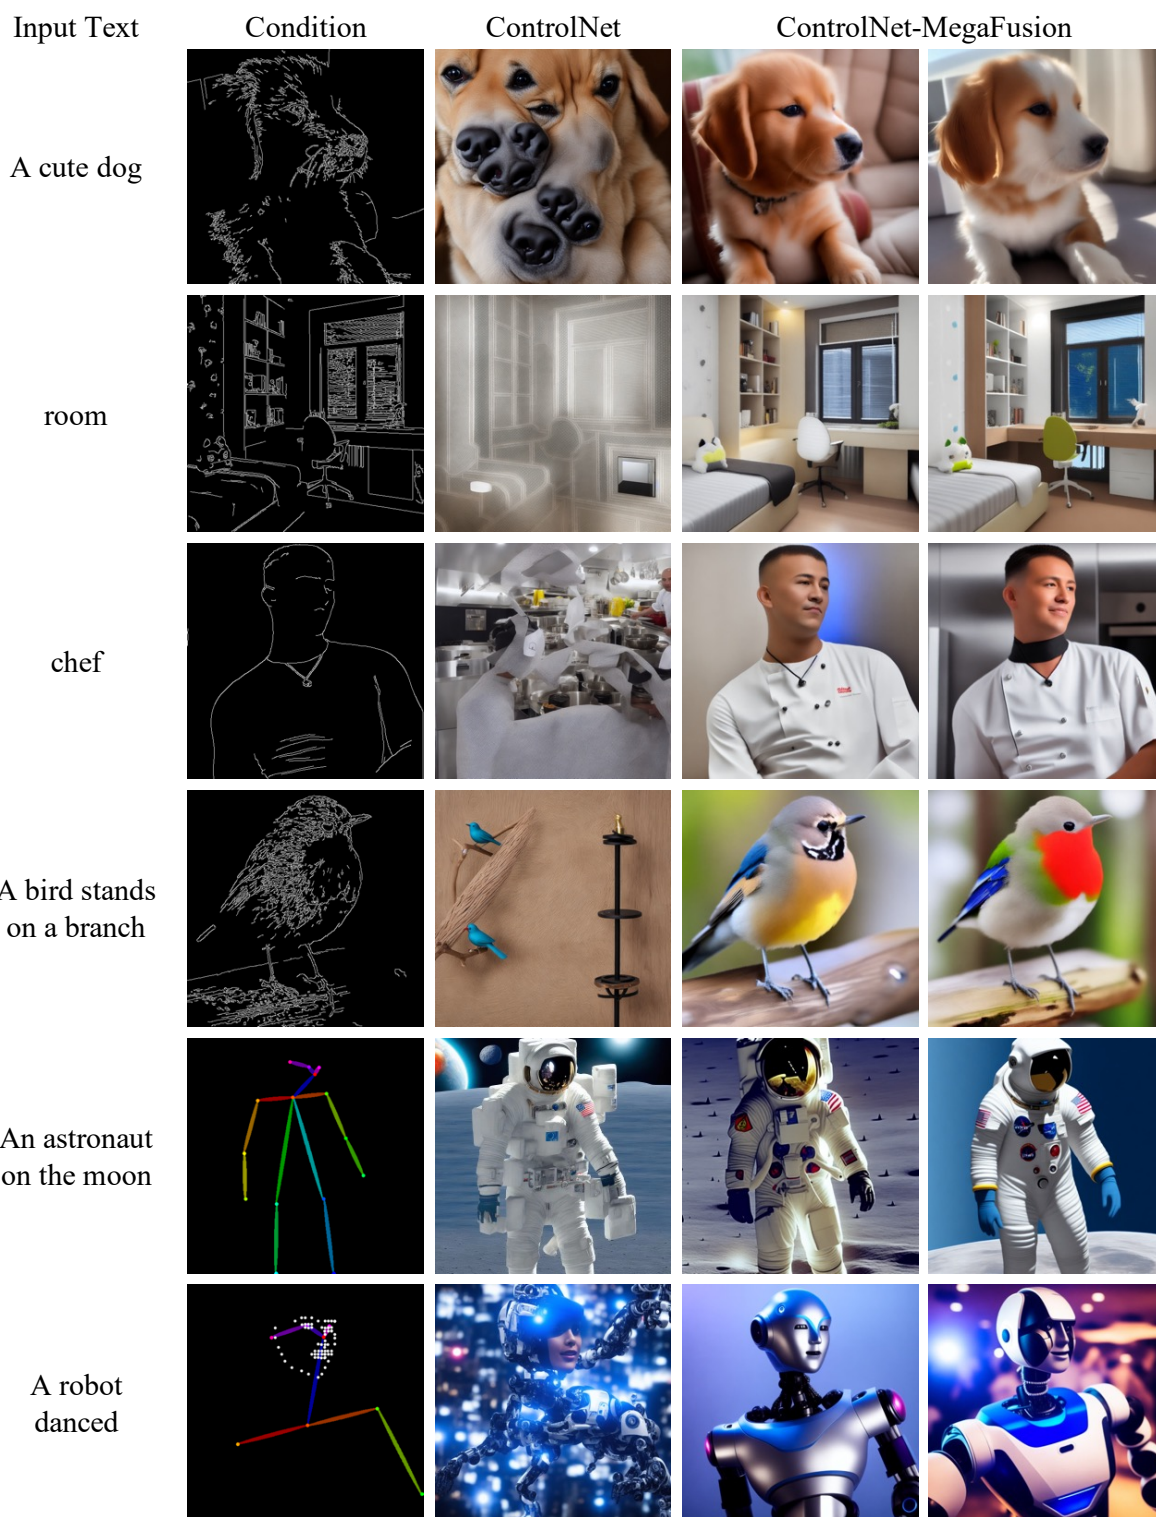

Figure 10. **Qualitative results** of applying our MegaFusion to ControlNet [12] with canny edges or human poses as extra conditions for higher-resolution ( $1024 \times 1024$ ) image generation with better semantics and fidelity.

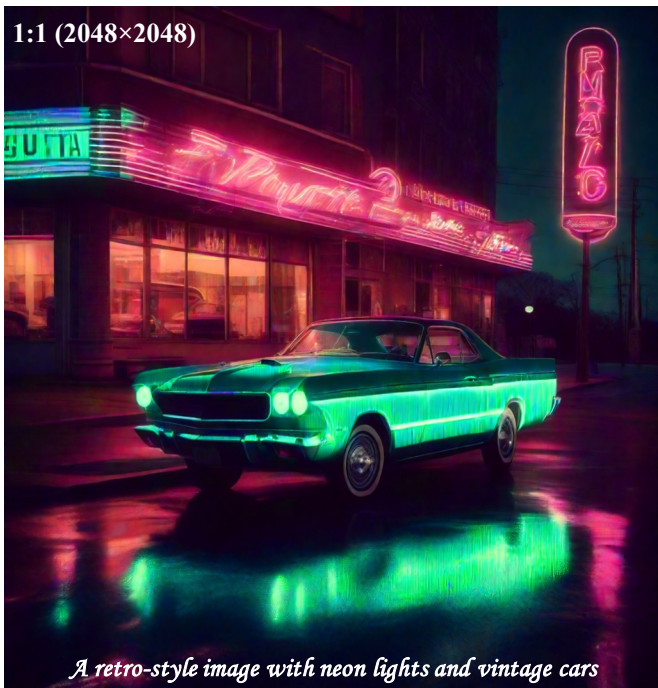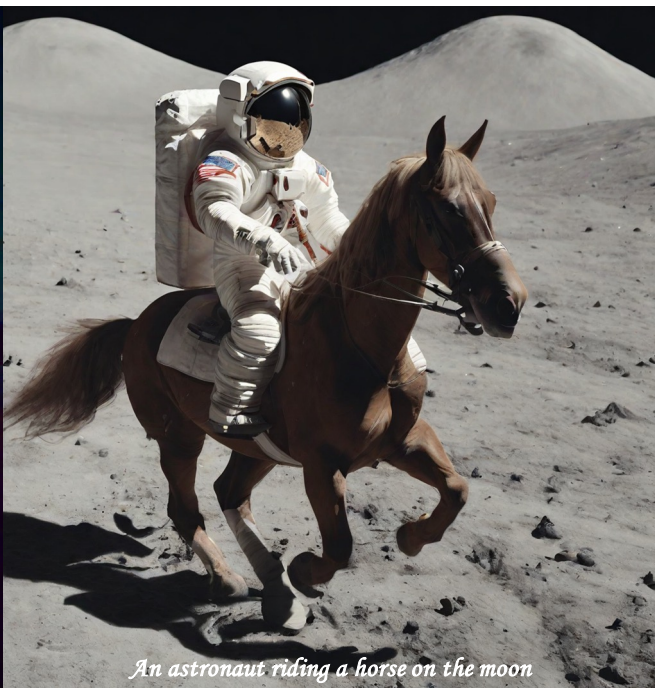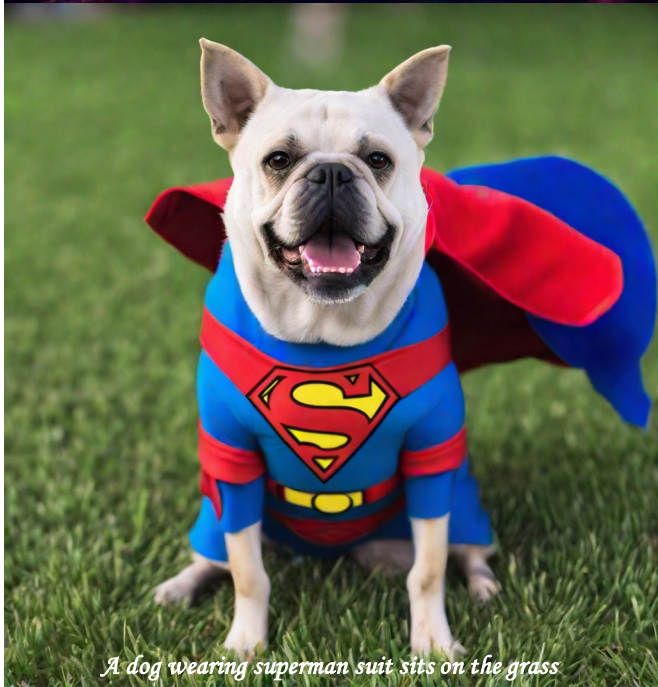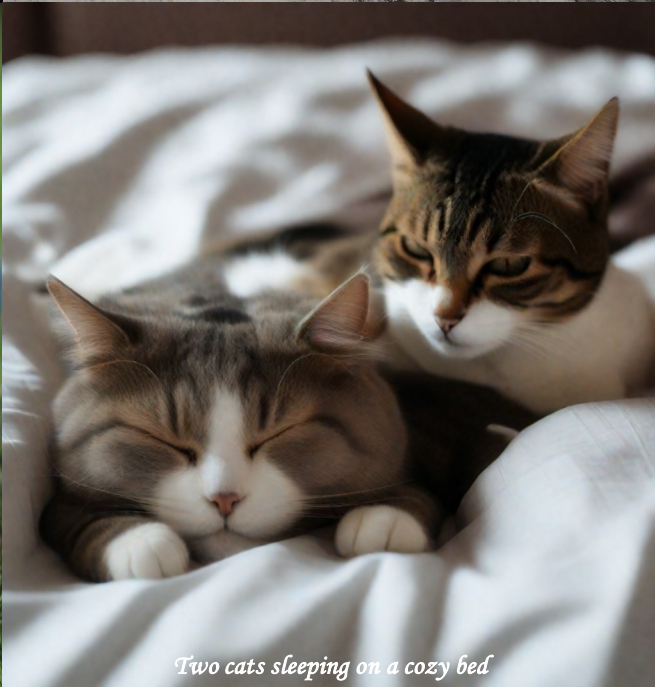

Figure 11. **More qualitative results** of applying our MegaFusion to SDXL [8] model for higher-resolution image generation with various aspect ratios and resolutions.

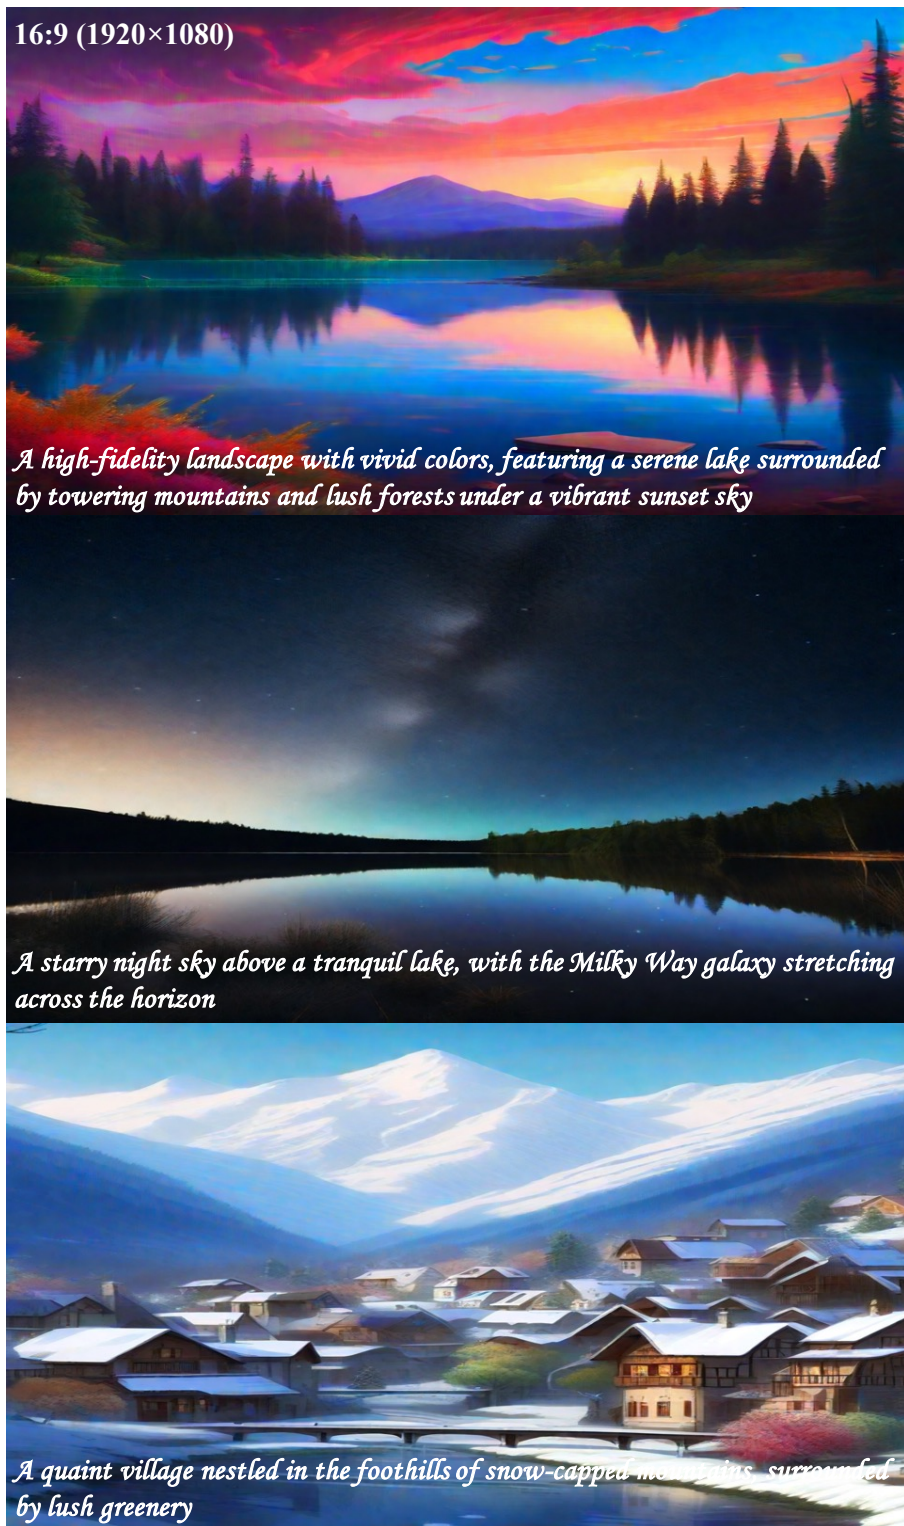

Figure 12. **More qualitative results** of applying our MegaFusion to SDXL [8] model for higher-resolution image generation with various aspect ratios and resolutions.

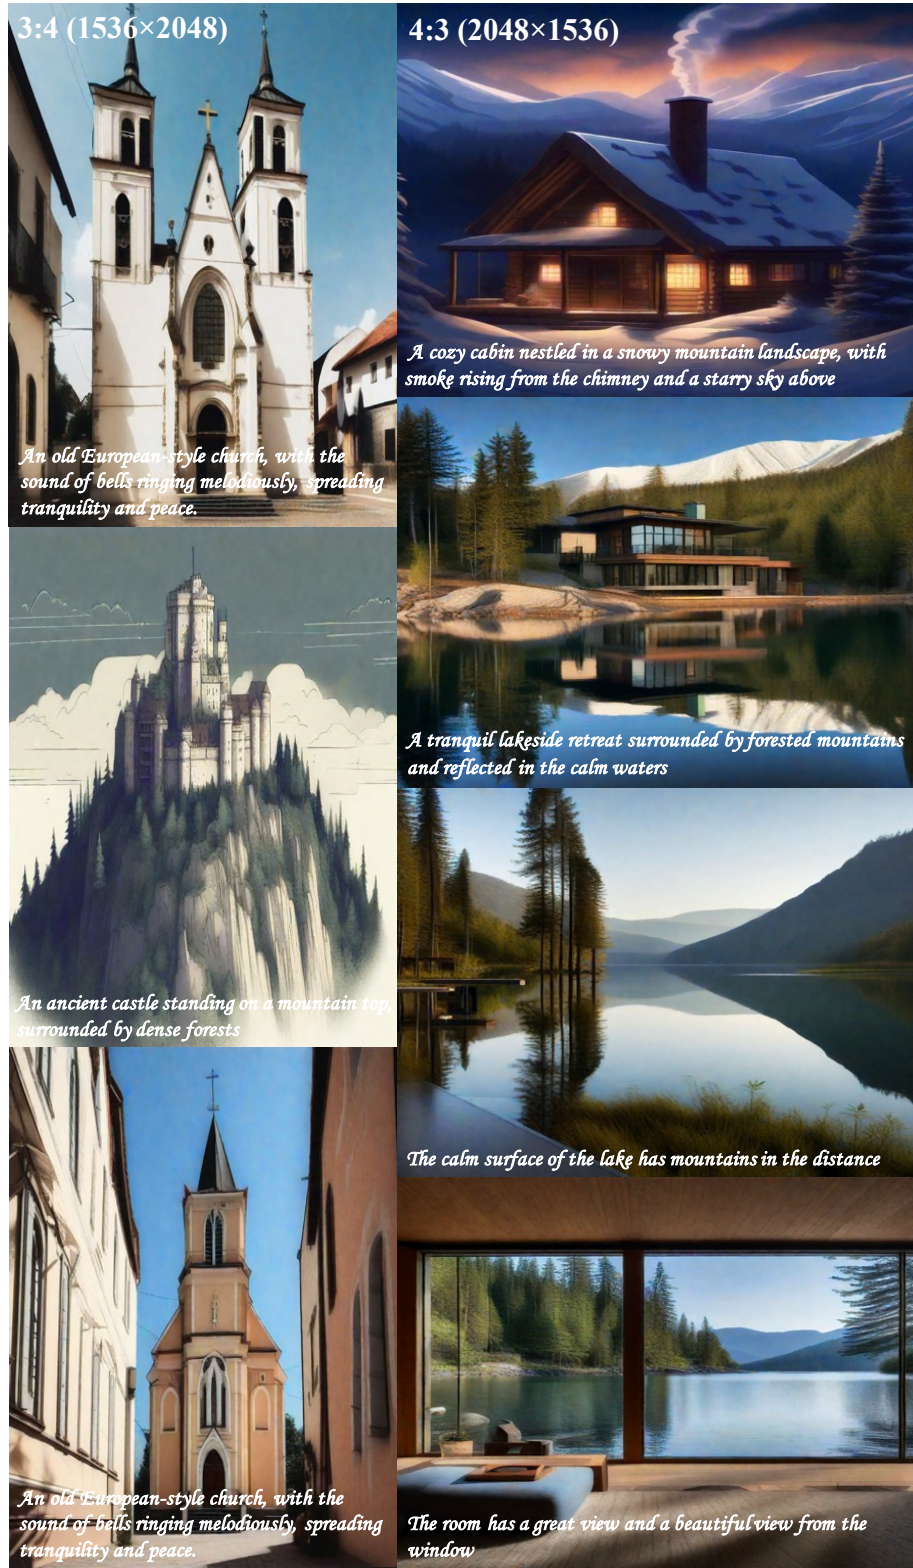

Figure 13. **More qualitative results** of applying our MegaFusion to SDXL [8] model for higher-resolution image generation with various aspect ratios and resolutions.

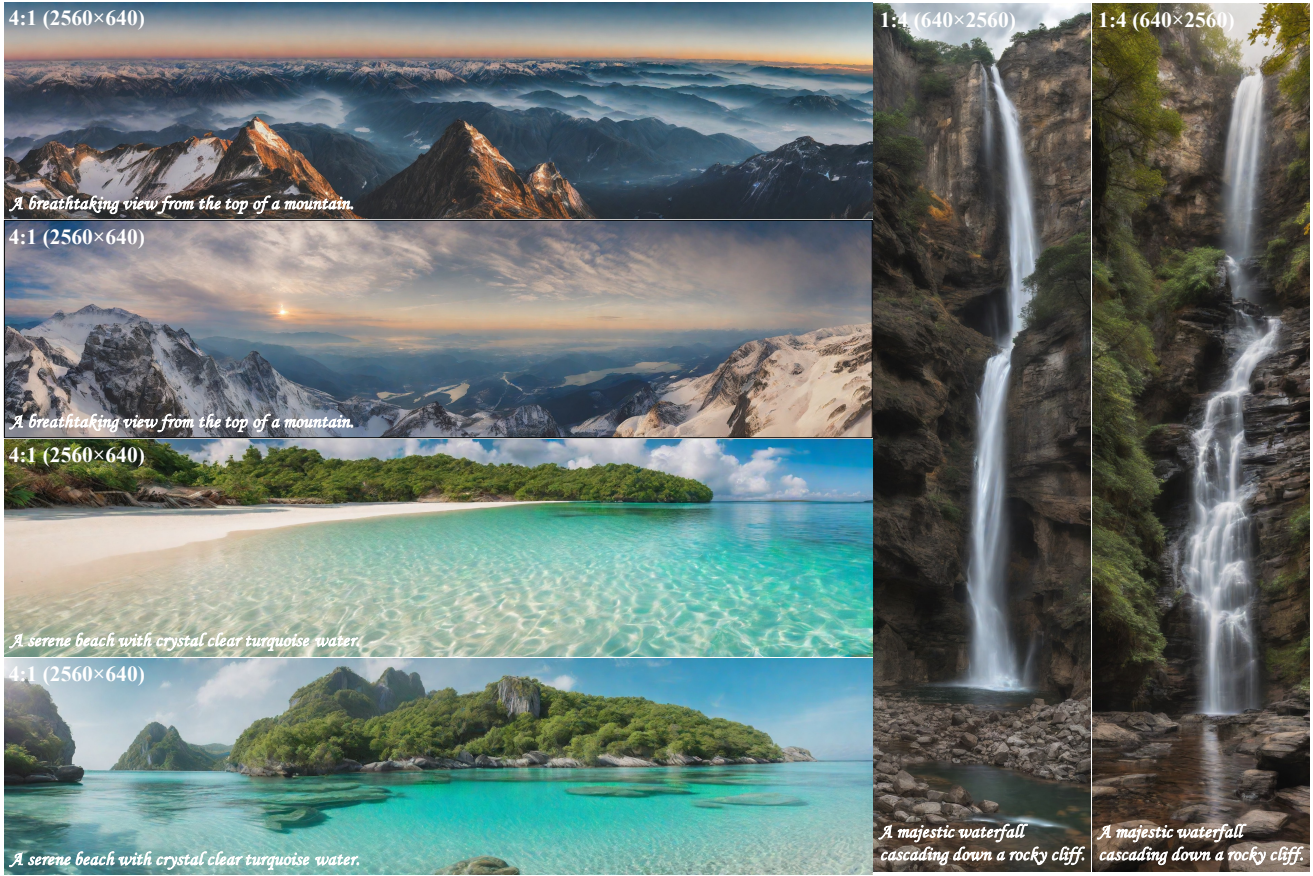

Figure 14. **More qualitative results** of applying our MegaFusion to SDXL [8] model for higher-resolution image generation with various **non-standard** aspect ratios and resolutions.

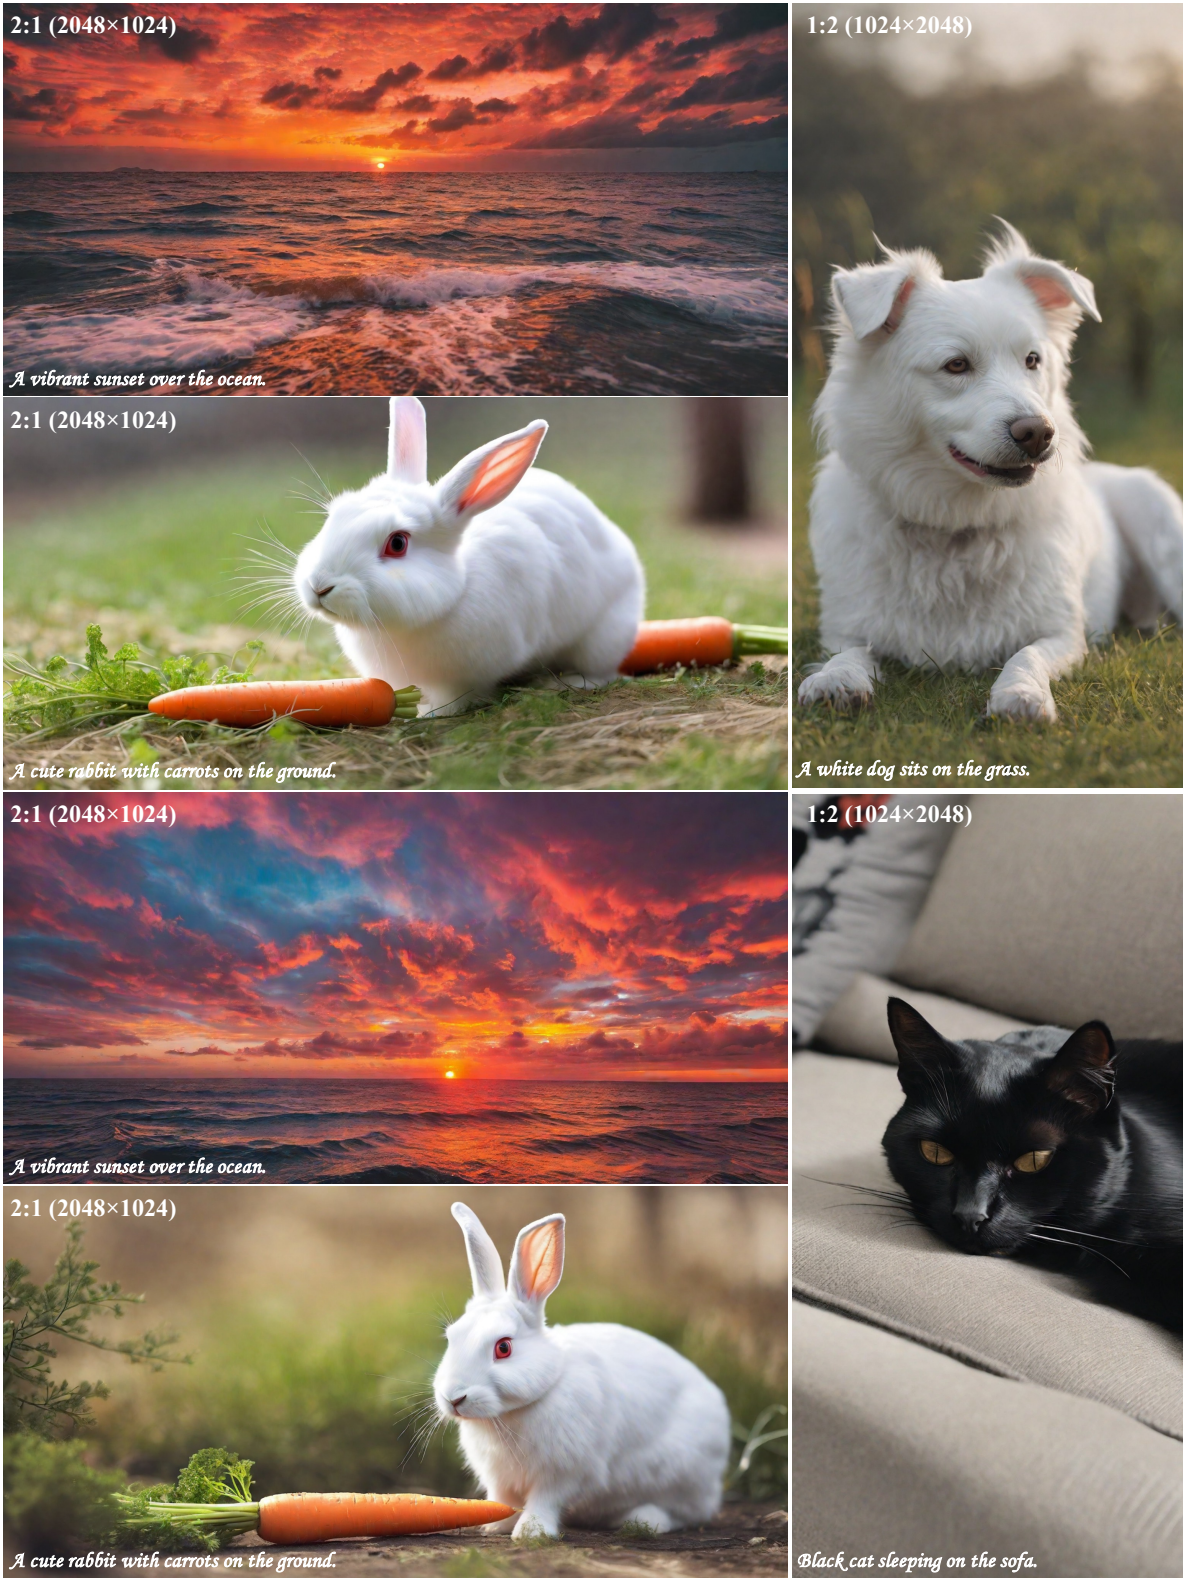

Figure 15. **More qualitative results** of applying our MegaFusion to SDXL [8] model for higher-resolution image generation with various **non-standard** aspect ratios and resolutions.

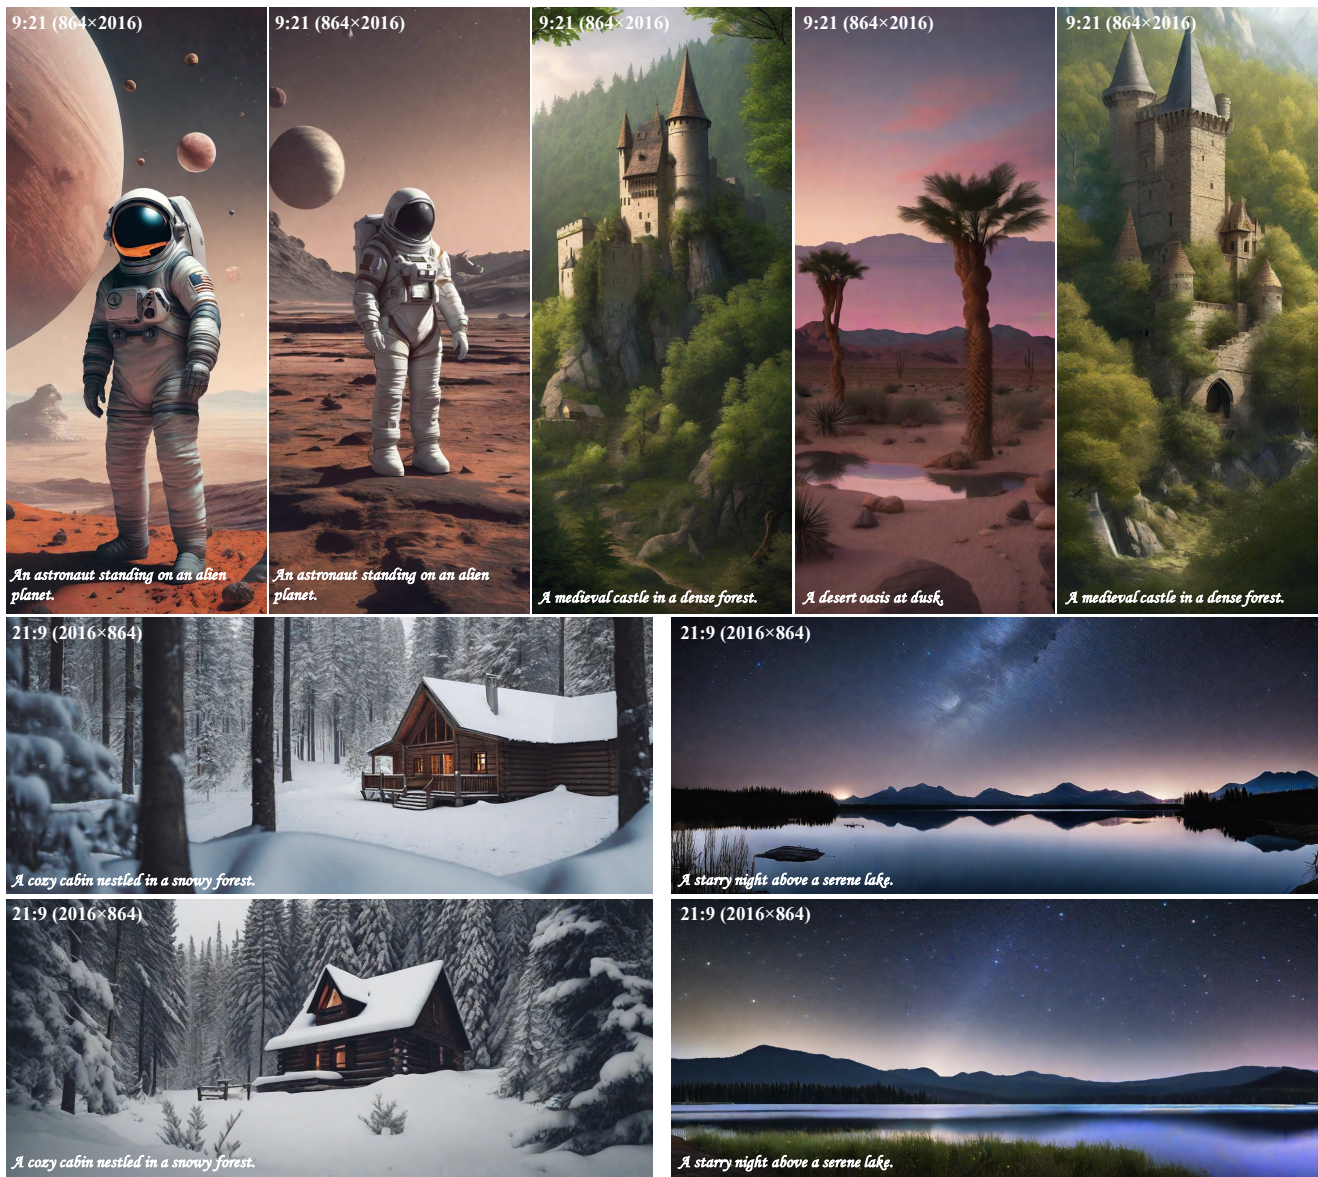

Figure 16. **More qualitative results** of applying our MegaFusion to SDXL [8] model for higher-resolution image generation with various **non-standard** aspect ratios and resolutions.



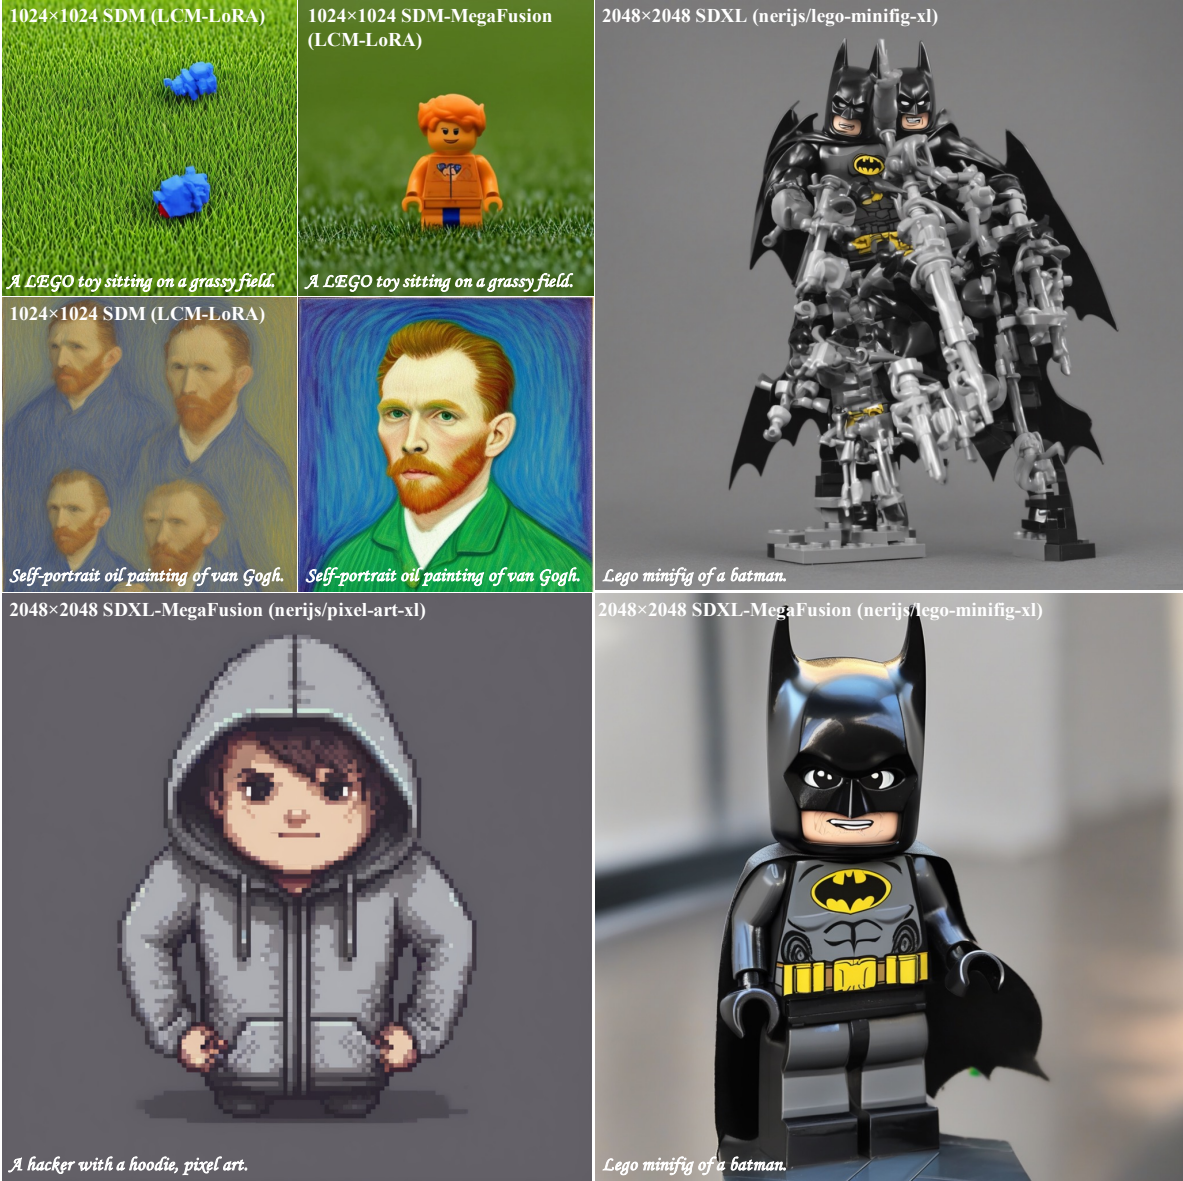

Figure 17. **Qualitative results** of applying MegaFusion to high-resolution image generation with LoRA-integrated SDM and SDXL. Similarly, SDM and SDXL integrated with LoRA also face common challenges like semantic deviations and object repetitions in high-resolution generation, while MegaFusion effectively addresses these challenges.

## References

- [1] Yogesh Balaji, Seungjun Nah, Xun Huang, Arash Vahdat, Jiaming Song, Karsten Kreis, Miika Aittala, Timo Aila, Samuli Laine, Bryan Catanzaro, Tero Karras, and Ming-Yu Liu. ediff-i: Text-to-image diffusion models with ensemble of expert denoisers. *arXiv preprint arXiv:2211.01324*, 2022. [3](#)
- [2] Deepfloyd. Deepfloyd. URL <https://www.deepfloyd.ai/>, 2023. [1](#), [2](#), [7](#)
- [3] Ruoyi Du, Dongliang Chang, Timothy Hospedales, Yi-Zhe Song, and Zhanyu Ma. Demofusion: Democratising high-resolution image generation with no \$\$\$\$. In *Proceedings of the IEEE Conference on Computer Vision and Pattern Recognition*, 2024. [1](#), [4](#), [9](#)
- [4] Patrick Esser, Sumith Kulal, Andreas Blattmann, Rahim Entezari, Jonas Müller, Harry Saini, Yam Levi, Dominik Lorenz, Axel Sauer, Frederic Boesel, et al. Scaling rectified flow transformers for high-resolution image synthesis. In *Proceedings of the International Conference on Machine Learning*, 2024. [4](#), [8](#)
- [5] Yingqing He, Shaoshu Yang, Haoxin Chen, Xiaodong Cun, Menghan Xia, Yong Zhang, Xintao Wang, Ran He, Qifeng Chen, and Ying Shan. Scalecrafter: Tuning-free higher-resolution visual generation with diffusion models. In *Proceedings of the International Conference on Learning Representations*, 2023. [4](#), [9](#)
- [6] Emiel Hoogeboom, Jonathan Heek, and Tim Salimans. Simple diffusion: End-to-end diffusion for high resolution images. In *Proceedings of the International Conference on Machine Learning*, 2023. [3](#)
- [7] Tsung-Yi Lin, Michael Maire, Serge Belongie, James Hays, Pietro Perona, Deva Ramanan, Piotr Dollár, and C Lawrence Zitnick. Microsoft coco: Common objects in context. In *Proceedings of the European Conference on Computer Vision*, 2014. [1](#), [6](#), [7](#), [8](#)
- [8] Dustin Podell, Zion English, Kyle Lacey, Andreas Blattmann, Tim Dockhorn, Jonas Müller, Joe Penna, and Robin Rombach. Sd-xl: Improving latent diffusion models for high-resolution image synthesis. In *Proceedings of the International Conference on Learning Representations*, 2024. [2](#), [11](#), [12](#), [13](#), [14](#), [15](#), [16](#)
- [9] Robin Rombach, Andreas Blattmann, Dominik Lorenz, Patrick Esser, and Bjorn Ommer. High-resolution image synthesis with latent diffusion models. In *Proceedings of the IEEE Conference on Computer Vision and Pattern Recognition*, 2022. [2](#), [6](#)
- [10] Catherine Wah, Steve Branson, Peter Welinder, Pietro Perona, and Serge J. Belongie. The caltech-ucsd birds-200-2011 dataset, 2011. [1](#), [2](#)
- [11] Hu Ye, Jun Zhang, Sibio Liu, Xiao Han, and Wei Yang. Ip-adapter: Text compatible image prompt adapter for text-to-image diffusion models. *arXiv preprint arxiv:2308.06721*, 2023. [4](#)
- [12] Lvmin Zhang, Anyi Rao, and Maneesh Agrawala. Adding conditional control to text-to-image diffusion models. In *Proceedings of the International Conference on Computer Vision*, 2023. [4](#), [10](#)
